# Supplementary material for: Hypophosphatemia in Pediatric Patients on Continuous Kidney Replacement Therapy–A WE-ROCK Study
Source: Research Square preprint supplement (doi:10.21203/rs.3.rs-9636966/v1), 2026-05-20
Supplement: Supplementary file 1 [file 847002fad28f22347d36c977.docx]

**STROBE Statement–Checklist of Items for Cohort Studies**

Hypophosphatemia in Pediatric Patients on Continuous Kidney Replacement Therapy–A WE-ROCK Study

Zafar et al., 2026

| **Item No** | **Section/Topic** | **Recommendation** | **Page No** | **Relevant Text from Manuscript** |
| --- | --- | --- | --- | --- |
| **Title and Abstract** | | | | |
| 1 | **Title and abstract** | (a) Indicate the study’s design with a commonly used term in the title or the abstract | 1,2 | Study design (“multicenter retrospective cohort study”) stated in abstract Methods. |
|  |  | (b) Provide in the abstract an informative and balanced summary of what was done and what was found | 2 | Structured abstract with Background, Methods, Results, and Conclusion sections. |
| **Introduction** | | | | |
| 2 | **Background / rationale** | Explain the scientific background and rationale for the investigation being reported | 4 | Background on hypophosphatemia in critical illness and continuous kidney replacement therapy (CKRT), rationale for studying fluid composition. |
| 3 | **Objectives** | State specific objectives, including any prespecified hypotheses | 4,5 | Objectives stated: describe incidence, identify risk factors, evaluate impact of PHOS+ vs. PHOS- fluids. |
| **Methods** | | | | |
| 4 | **Study design** | Present key elements of study design early in the paper | 5 | Identified as a secondary analysis of the WE-ROCK cohort. |
| 5 | **Setting** | Describe the setting, locations, and relevant dates, including periods of recruitment, exposure, follow-up, and data collection | 5 | Patients from Jan 1, 2015 to Dec 31, 2021. 7-day observation period described. |
| 6 | **Participants** | (a) Give the eligibility criteria, and the sources and methods of selection of participants. Describe methods of follow-up | 5 | Inclusion: age 0–25 yrs, CKRT for AKI or fluid overload. Exclusions: ESKD, non-AKI indication, ECMO, >1 fluid type. |
|  |  | (b) For matched studies, give matching criteria and number of exposed/unexposed | N/A | Not a matched study. |
| 7 | **Variables** | Clearly define all outcomes, exposures, predictors, potential confounders, and effect modifiers. Give diagnostic criteria. | 6 | Primary exposure (CKRT fluid type), primary outcome (hypophosphatemia <2.5 mg/dL), secondary outcomes (free days, mortality), and covariates defined. |
| 8 | **Data sources / measurement** | For each variable of interest, give sources of data and details of methods of assessment (measurement) | 5 | Data sources from WE-ROCK registry. PELOD-2, sepsis, fluid balance, CKRT dose all defined with measurement details. |
| 9 | **Bias** | Describe any efforts to address potential sources of bias | 6,7 | Adjusted analyses for confounders; limitations discuss indication bias, institutional confounding, retrospective design. |
| 10 | **Study size** | Explain how the study size was arrived at | 7 | CONSORT diagram (Figure 1) shows patient flow: starting cohort to 823 included after exclusions. |
| 11 | **Quantitative variables** | Explain how quantitative variables were handled in the analyses | 6 | Restricted cubic splines for phosphate trajectory; logistic regression for binary outcomes; IQR for continuous variables. |
| 12 | **Statistical methods** | (a) Describe all statistical methods, including those used to control for confounding | 6,7 | Wilcoxon/Kruskal-Wallis, Chi-squared/Fisher tests; multivariable logistic regression with a priori covariate selection. |
|  |  | (b) Describe any methods used to examine subgroups and interactions | 6,7 | Interaction term (fluid type × hypophosphatemia) and stratified analyses by fluid type reported. |
|  |  | (c) Explain how missing data were addressed | 7 | Missing data were assumed to be missing at random; no imputation was performed. Patients with missing phosphate levels were excluded (Figure 1 CONSORT). |
|  |  | (d) If applicable, explain how loss to follow-up was addressed | N/A | Retrospective registry study; not applicable. |
|  |  | (e) Describe any sensitivity analyses | 6,7 | Stratified models within each fluid type as a form of sensitivity/exploratory analysis. |
| **Results** | | | | |
| 13 | **Participants** | (a) Report numbers of individuals at each stage of study–e.g. numbers potentially eligible, examined for eligibility, confirmed eligible, included in the study, completing follow-up, and analyzed | 7 | CONSORT diagram (Figure 1) details exclusions from WE-ROCK to final n=823. |
|  |  | (b) Give reasons for non-participation at each stage | 7 | Reasons for exclusion specified: ultrafiltration only, >1 CKRT fluid type, missing phosphate data. |
|  |  | (c) Consider use of a flow diagram | 7 | CONSORT flow diagram included. |
| 14 | **Descriptive data** | (a) Give characteristics of study participants and information on exposures and potential confounders | 7; Table 1 | Baseline demographics, comorbidities, PELOD-2, fluid balance, CKRT details presented by fluid group. |
|  |  | (b) Indicate number of participants with missing data for each variable of interest |  | Not explicitly reported for each variable. |
|  |  | (c) Summarize follow-up time | 7; Table 1 | Median CKRT duration reported overall and by group (6 days, IQR 3-15). |
| 15 | **Outcome data** | Report numbers of outcome events or summary measures over time | 7,8; Tables 2, 5 | Hypophosphatemia incidence (Table 2); secondary outcomes including mortality (Table 5). |
| 16 | **Main results** | (a) Give unadjusted estimates and, if applicable, confounder-adjusted estimates and their precision. Make clear which confounders were adjusted for and why they were included. | 7,8; Tables 3, 4, 6 | Unadjusted (Table 3) and adjusted (Table 4) analyses for hypophosphatemia; mortality model (Table 6) with specified covariates. |
|  |  | (b) Report category boundaries when continuous variables were categorized | 5,6 | Hypophosphatemia threshold <2.5 mg/dL; center size categories defined (≤30, 31-60, >60 beds). |
|  |  | (c) If relevant, consider translating estimates of relative risk into absolute risk for a meaningful time period |  | Not performed. |
| 17 | **Other analyses** | Report other analyses done–e.g. analyses of subgroups and interactions, and sensitivity analyses | 8; Table 6 | Interaction term results and stratified analyses reported. |
| **Discussion** | | | | |
| 18 | **Key results** | Summarize key results with reference to study objectives | 8 | Key findings summarized–31% incidence of hypophosphatemia and reduced odds of hypophosphatemia with phosphate containing CKRT fluids. |
| 19 | **Limitations** | Discuss limitations of the study, taking into account sources of potential bias or imprecision. Discuss both direction and magnitude of any potential bias. | 9 | Detailed limitations section: indication bias, institutional confounding, exclusion of multi-fluid patients, 7-day data window, retrospective design. |
| 20 | **Interpretation** | Give a cautious overall interpretation of results considering objectives, limitations, multiplicity of analyses, results from similar studies, and other relevant evidence | 8,9 | Results interpreted in context of prior literature; caution noted regarding mortality associations and disease severity markers. |
| 21 | **Generalizability** | Discuss the generalizability (external validity) of the study results | 9 | Generalizability discussed: multicenter international design enhances it; limitation to AKI/fluid overload population noted. |
| **Other Information** | | | | |
| 22 | **Funding** | Give the source of funding and the role of the funders for the present study and, if applicable, for the original study on which the present article is based | 10 | Institutional funding for REDCap noted. |

**Note:** An Explanation and Elaboration article discusses each checklist item and gives methodological background and published examples of transparent reporting. The STROBE checklist is best used in conjunction with this article (freely available on the Web sites of PLoS Medicine at http://www.plosmedicine.org/, Annals of Internal Medicine at http://www.annals.org/, and Epidemiology at http://www.epidem.com/). Information on the STROBE Initiative is available at www.strobe-statement.org.
